# Supplementary material
Source: PubMed Central journal article supplement (PMC3874871)
Supplement: NIHMS536074-supplement-1.pdf [file NIHMS536074-supplement-1.pdf]

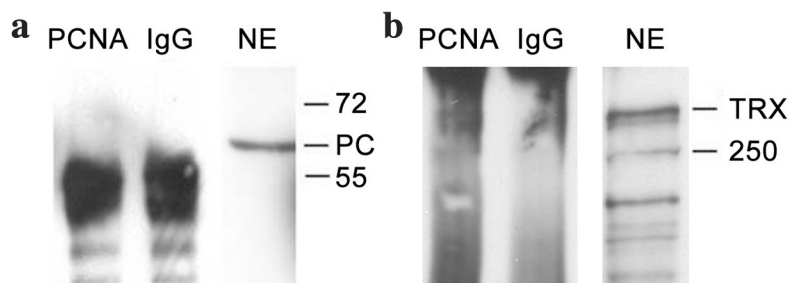

**Supplementary Figure S1. Polycomb and Trithorax do not coimmunoprecipitate with PCNA**

Nuclear extracts from *Drosophila* embryos were immunoprecipitated with PCNA or IgG antibodies. The immunoprecipitated material was analyzed by Western blotting with antibodies against (a) Polycomb (PC) and (b) Trithorax (TRX). NE, detection of PC and TRX in nuclear extract. Molecular weight markers are shown to the right.
